# Supplementary material for: Conservation of Tree Species Richness in a Traditional Agroforestry Landscape in the Vhembe Biosphere Reserve, South Africa
Source: MDPI journal article supplement (doi:10.3390/f13111766), 2022-10-27
Supplement: s1 [file s1]

**Table S1:** Species list from species richness plots and nominated species derived from the FGD sessions

| Latin binomial and author                                | Local name (Tshivenda) | English Common name    | FSA plant number |
|----------------------------------------------------------|------------------------|------------------------|------------------|
| <i>Azelia quanzensis</i> Welw.                           | Mutokota               | Pod mahogany           | 207              |
| <i>Albizia adianthifolia</i> (Schumach.) W.F.Wight       | Muelela                | Flat crown             | 148              |
| <i>Annona senegalensis</i> Pers.                         | Muembe                 | Wild custard apple     | 105              |
| <i>Antidesma venosum</i> E.May. Ex Tul.                  | Mukhwalikhwali         | Forest tasselberry     | 318              |
| <i>Artabotrys brachypetalus</i> Benth.                   | Munnamutswu            | Large hook berry       | 105.1            |
| <i>Brachylaena discolor</i> DC.                          | Mufhata                | Coast silver oak       | 724              |
| <i>Brachylaena huillensis</i> O.Hoffm.                   | Mufhaṭathavha          | Silver oak             | 727              |
| <i>Bridelia micrantha</i> (Hochst.) Baill.               | Munzere                | Coastal goldenleaf     | 324              |
| <i>Burkea africana</i> Hook                              | Mufhulu                | Wild seringa           | 197              |
| <i>Citrus x sinensis</i> (L.) Osbeck                     | Muswiri                | Sweet oranges          | NA               |
| <i>Combretum molle</i> R.Br. Ex G.Don                    | Mugwiti                | Velvet bust willow     | 537              |
| <i>Croton sylvaticus</i> Hochst.                         | Mulathoho              | Forest fever berry     | 330              |
| <i>Cussonia spicata</i> Thunb.                           | Musenzhe               | Cabbage tree           | 564              |
| <i>Dalbergia nitidula</i> Welw. Ex Baker                 | Musinde                | Glossy flat bean       | 234              |
| <i>Dichrostachys cinerea</i> Wight et Arn.               | Murenzhe               | Sickelbush             | 190              |
| <i>Diplorhynchus condylocarpon</i> (Müll.Arg) Pichon     | Muthowa                | Wild rubber            | 643              |
| <i>Englerophytum magalimontanum</i> (Sond.) T.D.Penn.    | Munombelo              | Milkplum               | 581              |
| <i>Faurea saligna</i> Harv.                              | Mutango                | Willow beechwood       | 75               |
| <i>Ficus sur</i> Forssk.                                 | Muhuyungala            | Broom cluster fig      | 50               |
| <i>Grewia microthyrsa</i> K.Schum. ex Burret             | Mupfuka                | Sand raisin            | 461.1            |
| <i>Hexalobus monopetalus</i> (A.Rich) Engl. et Diels     | Muhuhuma               | Shakamaplum            | 106              |
| <i>Hyperacanthus amoenus</i> (Sims) Bridson              | Murombe                | Spiny gardenia         | 690              |
| <i>Landolphia kirkii</i> Dyer ex Hook.F.                 | Muvhungo               | Rubber vine            | 640.8            |
| <i>Maesa lanceolata</i> Forssk.                          | Muunguri               | False assegai          | 577              |
| <i>Mangifera indica</i> L.                               | Munngo                 | Mango                  | NA               |
| <i>Mimusops obovata</i> Sond.                            | Mububulu               | Red milkwood           | 584              |
| <i>Musa acuminata</i> Colla                              | Muombva                | Banana                 | NA               |
| <i>Opuntia ficus-indica</i> (L.) Mill.                   | Mudoro                 | Sweet prickly pear     | NA               |
| <i>Parinari curatellifolia</i> Planch. Ex Benth.         | Muvhula                | Mobola plum            | 146              |
| <i>Peltophorum africanum</i> Sond.                       | Musese                 | African black wattle   | 215              |
| <i>Persea americana</i> Mill.                            | Muafukhada             | Avocado                | NA               |
| <i>Pseudolachnostylis maprouneifolia</i> Pax.            | Mutondowa              | Kudu berry             | 308              |
| <i>Psidium guajava</i> L.                                | Mugwavha               | Common Guava           | NA               |
| <i>Pteleopsis myrtifolia</i> (M.A.Lawson) Engl. et Diels | Nwanda                 | Stink bush willow      | 547              |
| <i>Pterocarpus angolensis</i> DC.                        | Mutondo                | Kiaat                  | 236              |
| <i>Pterocarpus rotundifolius</i> (Sond.) Druce           | Muhataha               | Round-leaved bloodwood | 237              |
| <i>Rothmannia capensis</i> Thumb.                        | Murathamapfene         | Wild gardenia          | 693              |
| <i>Sclerocarya birrea</i> (A.Rich) Hochst.               | Mufula                 | Marula                 | 360              |
| <i>Scolopia mundii</i> (Eckl. Et Zeyh.) Warb.            | Muhlono                | Red pear               | 496              |
| <i>Senegalia ataxacantha</i> (DC.) Kyal. et Boatwr.      | Muluwa                 | Flame thorn            | 160              |
| <i>Strychnos madagascariensis</i> Poir.                  | Mukwakwa               | Black monkey orange    | 626              |
| <i>Syzygium cordatum</i> Hochst. Ex C.Krauss             | Mutu                   | Water berry            | 555              |

|                                                    |                |                     |     |
|----------------------------------------------------|----------------|---------------------|-----|
| <i>Tabernaemontana elegans</i> Stapf.              | Muhatu         | Toad tree           | 644 |
| <i>Trichilia emetica</i> Vahl.                     | Mutshikili     | Natal mahogany      | 301 |
| <i>Vachellia karroo</i> (Hayne) Banfi et Galasso   | Muunga         | Sweet thorn         | 172 |
| <i>Vachellia sieberiana</i> (DC.) Kyal. et Boatwr. | Muunga-luselo  | Paperbark thorn     | 187 |
| <i>Vangueria infausta</i> Burch                    | Muzwilu        | Velvet wild medlar  | 702 |
| <i>Vitex ferruginea</i> Schumach. Et Thomn         | Mupfumbupfumbu | Plum fingerleaf     | 659 |
| <i>Ximenia caffra</i> Sond.                        | Muthanzwa      | Large sourplum      | 103 |
| <i>Xylopia odoratissima</i> Welw. ex Oliv.         | Muvhulavhusiku | Kalahari bitterwood | 110 |
| <i>Xylopia parviflora</i> (A.Rich) Benth.          | Muvhulavhusiku | Bushveld bitterwood | 109 |
| <i>Zanthoxylum davyi</i> (L.Verd.) Waterm.         | Munungu        | Forest knobweed     | 254 |
